# Supplementary material for: Xyloglucan endotransglucosylase-hydrolase30 negatively affects salt tolerance in Arabidopsis
Source: PubMed Central journal article supplement — J Exp Bot. 2019 Jun 29;70(19):5495–506. doi: 10.1093/jxb/erz311 (PMC6793456; doi:10.1093/jxb/erz311), 2019-06-29
Supplement: erz311_suppl_supplementary_table_s1.pdf [file erz311_suppl_supplementary_table_s1.pdf]

### Primer sequences used in this study

| Primer name                                                                 | Vector                 | Primer sequence (5'–3')                                     |
|-----------------------------------------------------------------------------|------------------------|-------------------------------------------------------------|
| <b>Primers for identifying mutants</b>                                      |                        |                                                             |
| <i>xth30-1</i> -LP1                                                         |                        | TTTTGTCTGAAGAACCCATGTC                                      |
| <i>xth30-1</i> -RP1                                                         |                        | CATTGCATCGTTTCTGATCAC                                       |
| <i>xth30-2</i> -LP2                                                         |                        | TCTCAATCTCAATCTCAGGCC                                       |
| <i>xth30-2</i> -RP2                                                         |                        | CGATAAGGGGTCAGCTTTTTC                                       |
| LBb1.3                                                                      |                        | ATTTTGCCGATTTCCGGAAC                                        |
| <b>Primers for RT-PCR</b>                                                   |                        |                                                             |
| ACTIN 2-F1                                                                  |                        | TGTCGTACGTTGAACAGAAAGC                                      |
| ACTIN 2-R1                                                                  |                        | CAGCACAATACCGGTTGTACG                                       |
| XTH30-F1                                                                    |                        | CGATCGCTATAACCGGTTCTGG                                      |
| XTH30-R1                                                                    |                        | TCTGCTCCCATTCATCGTT                                         |
| <b>Primers for qPCR</b>                                                     |                        |                                                             |
| ACTIN<br>2-qRT-F                                                            |                        | ACAACCGGTATTGTGCTGGA                                        |
| ACTIN<br>2-qRT-R                                                            |                        | CAAGACGGAGGATGGCATGA                                        |
| XTH30-qRT-F                                                                 |                        | CGATCGCTATAACCGGTTCTGG                                      |
| XTH30-qRT-R                                                                 |                        | CGGCAGTATAATCAGCGGGA                                        |
| CesA1-qRT-F                                                                 |                        | CCCATGGCCATACGGTTTCT                                        |
| CesA1-qRT-R                                                                 |                        | ACAGGTTGCCGTGGATCAAT                                        |
| CesA3-qRT-F                                                                 |                        | TACTCGTGGGAAGGGAGAGG                                        |
| CesA3-qRT-R                                                                 |                        | CAGAGAGGCGTTCAGGTGAG                                        |
| CesA6-qRT-F                                                                 |                        | TTCACTTGGTGGTCATGGCA                                        |
| CesA6-qRT-R                                                                 |                        | ACCATAGGCCTTGATGTGC                                         |
| <b>Primers used in transgenic construction and subcellular localization</b> |                        |                                                             |
| XTH30-Full<br>length-F                                                      | pEarley<br>Gate<br>101 | ACAAGTTTGTACAAAAAAGCAGGCTTCACCATGGCTT<br>TGTCCTTATCTTTCTAGC |
| XTH30-Full<br>length-R                                                      | pEarley<br>Gate<br>101 | ACCACTTTGTACAAGAAAGCTGGGTACATTCTGGTGT<br>TTGGGTATGGT        |
| <b>Primers for GUS</b>                                                      |                        |                                                             |
| XTH30-<br>Promoter-F                                                        | pGWB3                  | ACAAGTTTGTACAAAAAAGCAGGCTTCACCAAGAGTT<br>GGTAAATACAGAAGGGT  |
| XTH30-<br>Promoter-R                                                        | pGWB3                  | ACCACTTTGTACAAGAAAGCTGGGTCTTTCTCGGA<br>AGAAGAAAAAGA         |
